# Supplementary material
Source: Research Square preprint supplement (doi:10.21203/rs.3.rs-9455777/v1)
Supplement: Supplementary file 1 [file fc8cb9049d2853d7c6c0d1ce.docx]

**Online Resource 1. Opioid conversion ratios**

| **Name** | **Route of administration** | **Equivalent amount in oral morphine 30 mg** |
| --- | --- | --- |
| Morphine | Oral | 30 mg |
|  | Injection | 15 mg |
|  | Rectal | 20 mg |
| Hydromorphone | Oral | 6 mg |
|  | Injection | 2 mg |
| Oxycodone | Oral | 20 mg |
|  | Injection | 15 mg |
| Fentanyl | Transdermal | 12.5 μg/h |
|  | Injection | 0.3 mg |
| Tapentadol | Oral | 100 mg |
| Codeine | Oral | 200 mg |
| Tramadol | Oral, Injection | 150 mg |
| Methadone | Oral | 4.09 mg (In cases of methadone ≤15 mg/day)  3.27 mg (In cases of methadone >15 mg/day) |
| Buprenorphine | Rectal, Injection | 0.6 mg |
| Pentazocine | Injection | 45 mg |
|  | Oral | 170 mg |


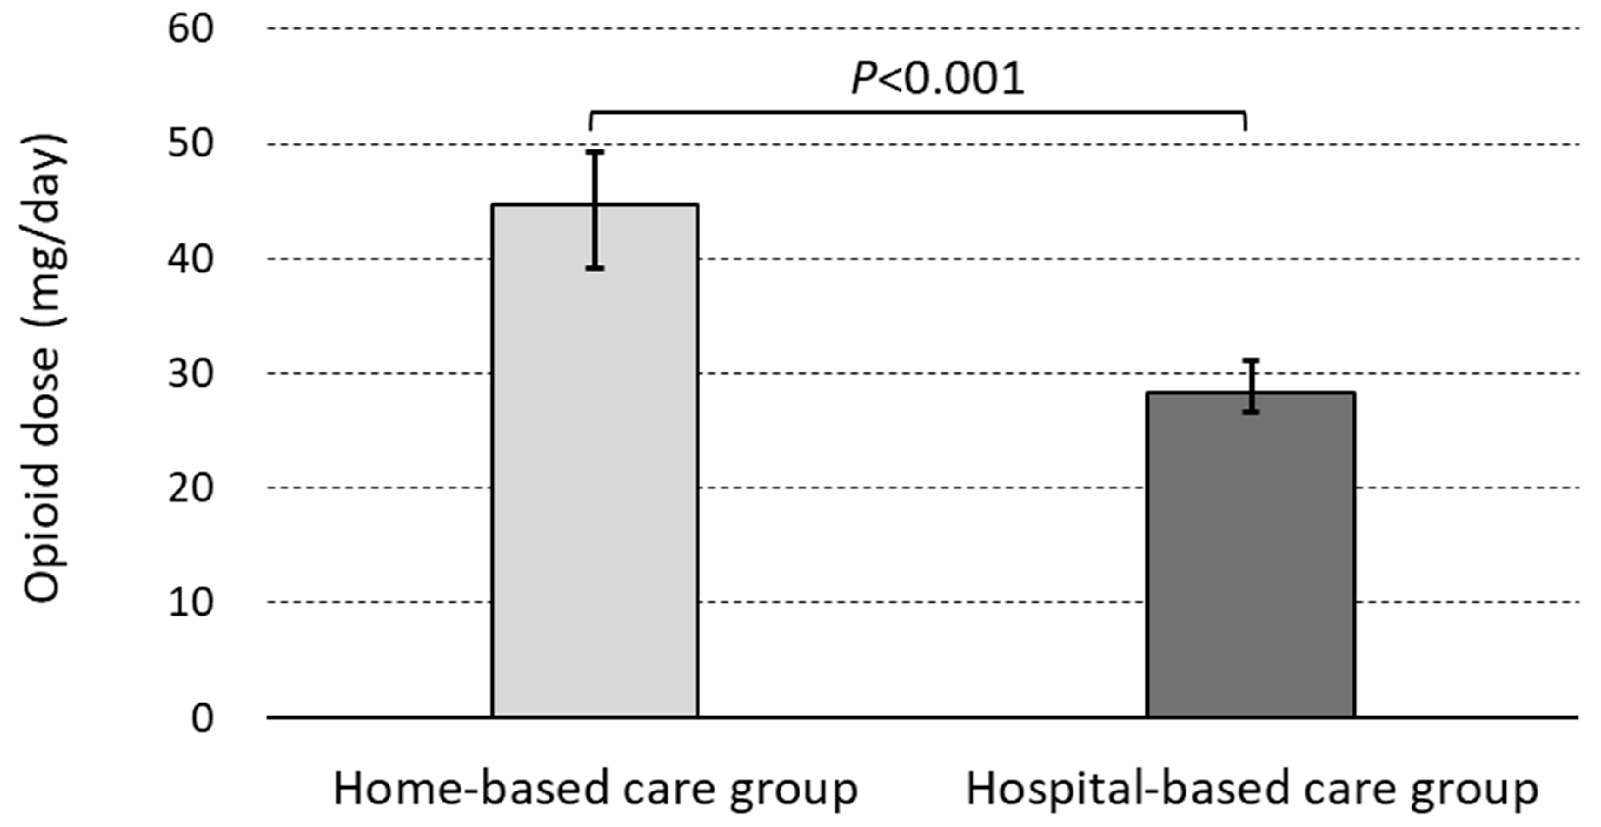


**Online Resource 2. Daily opioid dose during the last 90 days before death in the two groups, calculated using data from patients in the top 80% of opioid consumption**

Data are presented as medians with 95% confidence intervals in morphine milligram equivalents. Between-group comparison was performed using the Mann–Whitney U test.


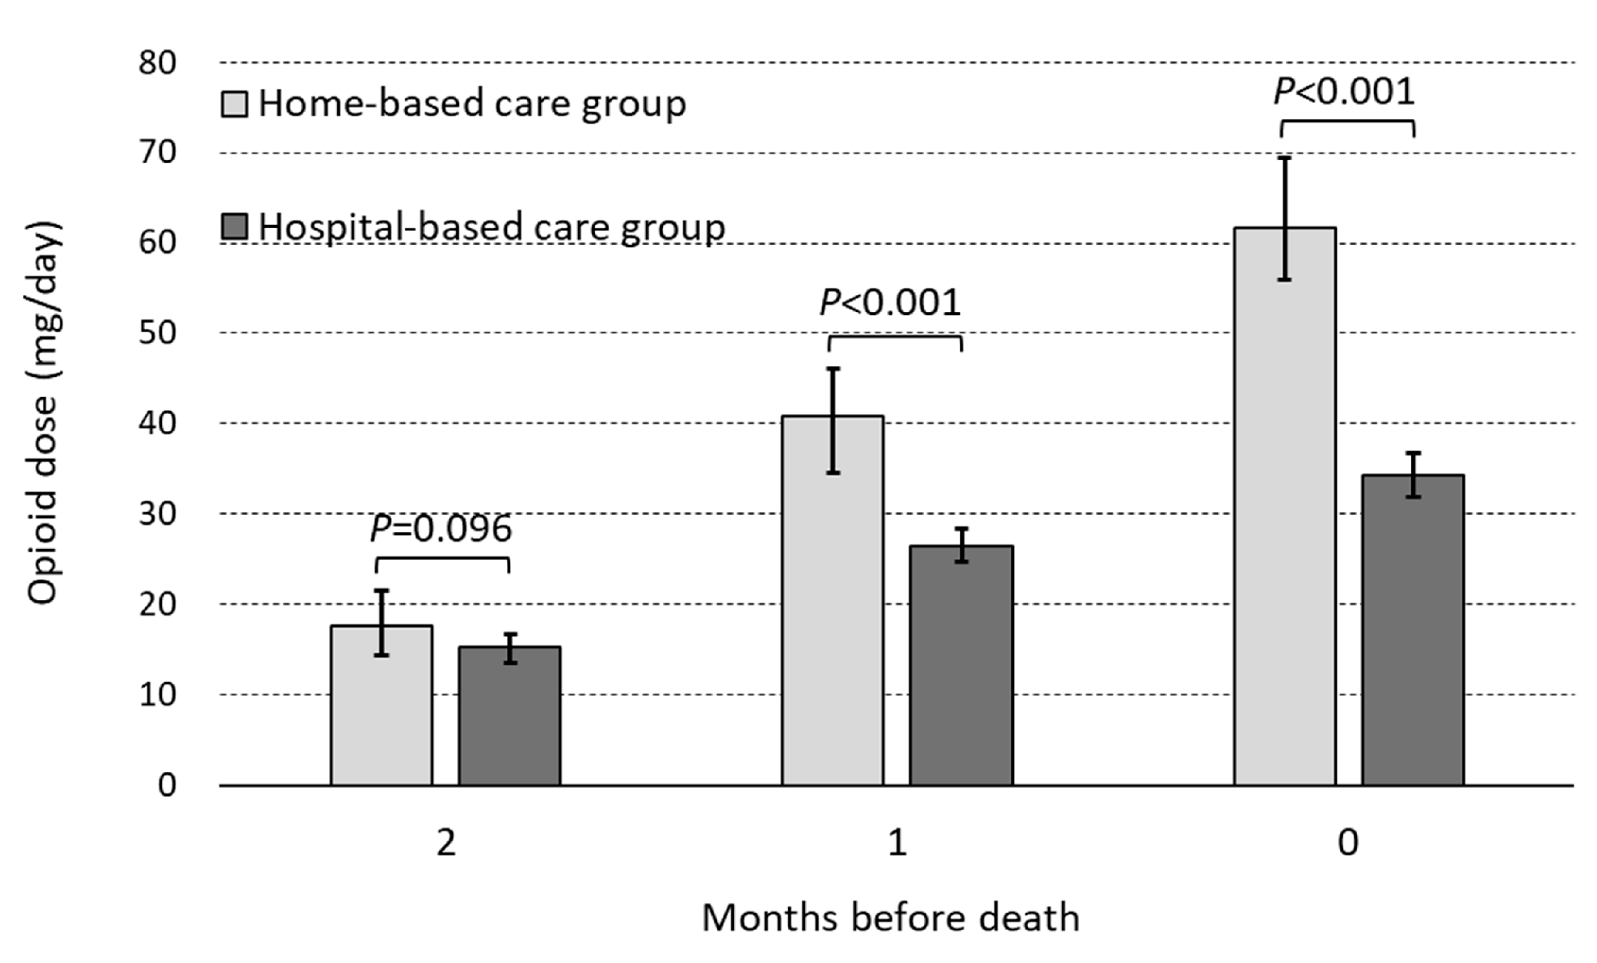


**Online Resource 3. Trends in opioid dose over the last 3 months before death in the two groups, calculated using data from patients in the top 80% of opioid consumption**

Data are presented as medians with 95% confidence intervals in morphine milligram equivalents. Between-group comparisons were performed using the Mann–Whitney U test with Bonferroni correction.

**Online Resource 4. Unadjusted baseline characteristics by region**

|  | **Hokkaido/Tohoku** | | **Kanto** | | **Chubu** | | **Kansai** | | **Chugoku** | | **Shikoku** | | **Kyusyu/Okinawa** | |
| --- | --- | --- | --- | --- | --- | --- | --- | --- | --- | --- | --- | --- | --- | --- |
|  | **Hospital** | **Home** | **Hospital** | **Home** | **Hospital** | **Home** | **Hospital** | **Home** | **Hospital** | **Home** | **Hospital** | **Home** | **Hospital** | **Home** |
| **N** | 545 | 41 | 3046 | 542 | 1857 | 183 | 1008 | 164 | 287 | 31 | 141 | 18 | 517 | 49 |
| **Proportion of patients receiving home-based care (%)** | 7.0 | | 15.1 | | 9.0 | | 14.0 | | 9.8 | | 11.3 | | 8.7 | |
| **Sex (male, %)** | 57.1 | 61.0 | 60.3 | 53.3 | 61.7 | 53.6 | 62.2 | 51.2 | 62.4 | 51.6 | 61.7 | 55.6 | 61.1 | 57.1 |
| **Age (mean ± standard deviation)** | 58.6  ±10.2 | 59.0  ±11.9 | 59.1  ±9.7 | 57.1  ±10.3 | 57.5  ±10.0 | 55.9  ±10.9 | 59.2  ±9.6 | 56.3  ±10.6 | 56.5  ±10.1 | 52.2  ±12.4 | 59.3  ±10.7 | 55.3  ±9.6 | 57.3  ±9.8 | 53.2  ±12.6 |
| **Charlson Comorbidity Inex (mean ± standard deviation)** | 9.7±3.1 | 10.2±2.8 | 9.5±3.0 | 9.6±3.3 | 8.8±3.2 | 9.3±3.4 | 9.3±3.0 | 9.2±2.8 | 9.6±3.1 | 9.5±3.4 | 9.2±3.4 | 9.1±4.7 | 9.3±2.7 | 9.3±2.8 |
| **Radiation therapy within 6 months before the last chemotherapy (%)** | 19.5 | 14.6 | 21.9 | 24.4 | 21.4 | 27.9 | 23.3 | 17.1 | 23.0 | 16.1 | 16.3 | 27.8 | 22.2 | 34.7 |
| **Lower gastrointestinal cancer (%)** | 30.1 | 29.3 | 25.8 | 24.7 | 27.3 | 24.6 | 27.5 | 25.0 | 25.8 | 29.0 | 18.4 | 5.6 | 27.5 | 22.5 |
| **Upper gastrointestinal cancer (%)** | 27.2 | 34.2 | 23.4 | 23.1 | 22.7 | 26.2 | 26.1 | 26.8 | 30.3 | 25.8 | 28.4 | 22.2 | 25.9 | 28.6 |
| **Lung cancer (%)** | 27.7 | 14.6 | 24.9 | 20.1 | 21.6 | 27.3 | 23.0 | 18.9 | 22.0 | 9.7 | 31.2 | 22.2 | 20.9 | 10.2 |
| **Pancreatic cancer (%)** | 22.2 | 22.0 | 18.3 | 22.0 | 17.8 | 21.3 | 20.7 | 24.4 | 22.7 | 16.1 | 19.9 | 11.1 | 17.4 | 16.3 |

Hospital, Hospital-based care group; Home, home-based care group.

**
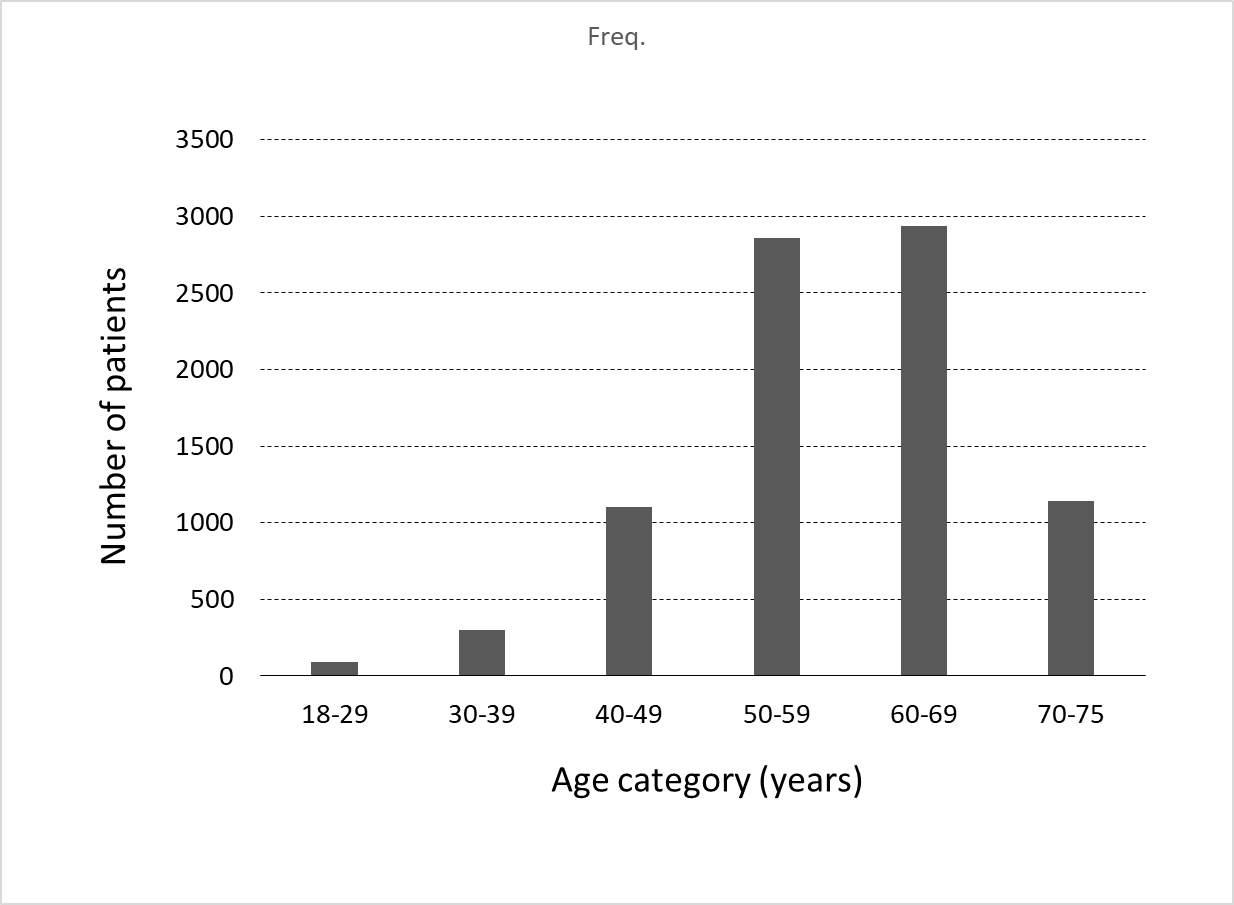
**

**Online Resource 5. Age distribution of study population**
